# Supplementary material
Source: PubMed Central journal article supplement (PMC3283218)
Supplement: supp_M111.324350_jbc.M111.324350-1.pdf [file supp_M111.324350_jbc.M111.324350-1.pdf]

SUPPLEMENTAL DATA

Table S I

Table S II

Table S III

Table S IV

**Table S I. Strains and plasmids used in the yeast experiments**

| <b>Strain</b>             | <b>Relevant Genotype</b>                                                                                                           | <b>Source or reference</b>                                                  |
|---------------------------|------------------------------------------------------------------------------------------------------------------------------------|-----------------------------------------------------------------------------|
| BY4742                    | Mat $\alpha$ his3 $\Delta$ 1 leu2 $\Delta$ 0 lys2 $\Delta$ 0 ura3 $\Delta$ 0                                                       | Open Biosystems<br>(Brachmann et al, 1998)                                  |
| BY4741                    | Mat $\alpha$ his3 $\Delta$ 1 leu2 $\Delta$ 0 met15 $\Delta$ 0 ura3 $\Delta$ 0                                                      | Open Biosystems<br>(Brachmann et al, 1998)                                  |
| BY4743                    | BY4741/BY4742                                                                                                                      | Open Biosystems<br>(Brachmann et al, 1998)                                  |
| BY4739-10399              | <i>spo7</i> $\Delta$ :: <i>Kan</i> <sup>r</sup> (in BY4739)                                                                        | Open Biosystems<br>(Winzeler et al, 1999)                                   |
| BY4742-16601              | <i>nem1</i> $\Delta$ :: <i>Kan</i> <sup>r</sup> (in BY4742)                                                                        | Open Biosystems<br>(Winzeler et al, 1999)                                   |
| SH003                     | <i>spo7</i> $\Delta$ :: <i>HIS3</i> (in BY4742)                                                                                    | This study                                                                  |
| SH004                     | <i>nem1</i> $\Delta$ :: <i>Kan</i> <sup>r</sup> <i>spo7</i> $\Delta$ :: <i>HIS3</i> (in BY4742)                                    | This study                                                                  |
| SH005                     | <i>spo7</i> $\Delta$ :: <i>HIS3</i> (in BY4741)                                                                                    | This study                                                                  |
| SH009                     | Diploid <i>spo7</i> $\Delta$ generated by mating haploid <i>spo7</i> $\Delta$ (SH003 and SH005)                                    | This study                                                                  |
| <b>Plasmid</b>            | <b>Relevant characteristics</b>                                                                                                    | <b>Source or reference</b>                                                  |
| pRS313                    | Yeast centromeric plasmid (YCp) with <i>HIS3</i> marker                                                                            | (Sikorski & Hieter, 1989)                                                   |
| pRS315                    | Yeast centromeric plasmid (YCp) with <i>LEU2</i> marker                                                                            | (Sikorski & Hieter, 1989)                                                   |
| pRS316                    | Yeast centromeric plasmid (YCp) with <i>URA3</i> marker                                                                            | (Sikorski & Hieter, 1989)                                                   |
| pRS317                    | Yeast centromeric plasmid (YCp) with <i>LYS2</i> marker                                                                            | (Sikorski & Boeke, 1991)                                                    |
| pRS315-PGK1               | pRS315 containing <i>PGK1</i> promoter and terminator                                                                              | (Binns et al, 2006)                                                         |
| pRS316-PGK1               | pRS316 containing <i>PGK1</i> promoter and terminator                                                                              | (Binns et al, 2006)                                                         |
| ID: 5266084               | Full length cDNA clone encoding NEP1-R1 (accession: BC036683)                                                                      | Open Biosystems                                                             |
| ID: 4123279               | cDNA clone encoding CTDNEP1 (accession: BC009295)                                                                                  | Open Biosystems                                                             |
| pRS315-PGK1-NEP1-R1       | pRS315 expressing NEP1-R1 under control of <i>PGK1</i> promoter/terminator                                                         | This study                                                                  |
| pRS316-PGK1-CTDNEP1       | pRS316 expressing CTDNEP1 under control of <i>PGK1</i> promoter/terminator                                                         | This study                                                                  |
| BG1805                    | MORF (movable ORF) vector, which was used as a template for HA-protA construct                                                     | (Gelperin et al, 2005)                                                      |
| pRS317-PGK1-Kar2-CFP-HDEL | pRS317 expressing ER luminal CFP marker subcloned from pRS315 PGK1-CFP-HDEL                                                        | (Szymanski et al, 2007)<br>This study                                       |
| pFA6-HygroMX              | pFA6 vector containing <i>hph</i> (hygromycin drug cassettes)                                                                      | (Longtine et al, 1998;<br>Goldstein & McCusker, 1999)<br>Gift from B.Tu lab |
| pFA6-CFP HygroMX          | pFA6 vector encoding CFP which can be used to insert CFP in C-terminal of target ORF with hygromycin drug cassettes ( <i>hph</i> ) | This study                                                                  |
| pRS315-PGK1-              | pRS315 expressing C-terminally tagged NEP1-R1-                                                                                     | (Szymanski et al, 2007)                                                     |

|                            |                                                                                                       |            |
|----------------------------|-------------------------------------------------------------------------------------------------------|------------|
| NEP1-R1-HA-protA           | HA-protA under control of <i>PGK1</i> promoter/terminator                                             | This study |
| pRS316-PGK1-CTDNEP1-2xFLAG | pRS315 expressing C-terminally tagged CTDNEP1-2xFLAG under control of <i>PGK1</i> promoter/terminator | This study |
| pRS315-PGK1-SPO7           | pRS315 expressing Spo7p under control of <i>PGK1</i> promoter/terminator                              | This study |
| pRS317-PGK1-SEC63-CFP      | pRS317 expressing Sec63p under control of <i>PGK1</i> promoter and <i>ADHI</i> terminator             | This study |

Binns D, Januszewski T, Chen Y, Hill J, Markin VS, Zhao Y, Gilpin C, Chapman KD, Anderson RG, Goodman JM (2006) An intimate collaboration between peroxisomes and lipid bodies. *J Cell Biol* **173**: 719-731

Brachmann CB, Davies A, Cost GJ, Caputo E, Li J, Hieter P, Boeke JD (1998) Designer deletion strains derived from *Saccharomyces cerevisiae* S288C: a useful set of strains and plasmids for PCR-mediated gene disruption and other applications. *Yeast* **14**: 115-132

Gelperin DM, White MA, Wilkinson ML, Kon Y, Kung LA, Wise KJ, Lopez-Hoyo N, Jiang L, Piccirillo S, Yu H, Gerstein M, Dumont ME, Phizicky EM, Snyder M, Grayhack EJ (2005) Biochemical and genetic analysis of the yeast proteome with a movable ORF collection. *Genes Dev* **19**: 2816-2826

Goldstein AL, McCusker JH (1999) Three new dominant drug resistance cassettes for gene disruption in *Saccharomyces cerevisiae*. *Yeast* **15**: 1541-1553

Longtine MS, McKenzie A, 3rd, Demarini DJ, Shah NG, Wach A, Brachat A, Philippsen P, Pringle JR (1998) Additional modules for versatile and economical PCR-based gene deletion and modification in *Saccharomyces cerevisiae*. *Yeast* **14**: 953-961

Sikorski RS, Boeke JD (1991) In vitro mutagenesis and plasmid shuffling: from cloned gene to mutant yeast. *Methods Enzymol* **194**: 302-318

Sikorski RS, Hieter P (1989) A system of shuttle vectors and yeast host strains designed for efficient manipulation of DNA in *Saccharomyces cerevisiae*. *Genetics* **122**: 19-27

Winzeler EA, Shoemaker DD, Astromoff A, Liang H, Anderson K, Andre B, Bangham R, Benito R, Boeke JD, Bussey H, Chu AM, Connelly C, Davis K, Dietrich F, Dow SW, El Bakkoury M, Foury F, Friend SH, Gentalen E, Giaever G, Hegemann JH, Jones T, Laub M, Liao H, Liebundguth N, Lockhart DJ, Lucau-Danila A, Lussier M, M'Rabet N, Menard P, Mittmann M, Pai C, Rebischung C, Revuelta JL, Riles L, Roberts CJ, Ross-MacDonald P, Scherens B, Snyder M, Sookhai-Mahadeo S, Storms RK, Veronneau S, Voet M, Volckaert G, Ward TR, Wysocki R, Yen GS, Yu K, Zimmermann K, Philippsen P, Johnston M, Davis RW (1999) Functional characterization of the *S. cerevisiae* genome by gene deletion and parallel analysis. *Science* **285**: 901-906

**Table S II.** Primers used in the yeast study

| Primer name                 | Sequence <sup>a</sup>                                                        | Remark                                                        |
|-----------------------------|------------------------------------------------------------------------------|---------------------------------------------------------------|
| XbaI_NEP1-R1_F              | 5' -GCTCTAGAATGAACTCGCTGGAGCAGGC-3'                                          | NEP1-R1 subcloning                                            |
| NEP1-R1_HindIII_R           | 5' -CCCAAGCTTTCATTGAACATGAGGCCTAGGTTTC-3'                                    |                                                               |
| XbaI_CTDNEP1_F              | 5' -GCTCTAGAATGATGCGGACGCAGTGTC-3'                                           | CTDNEP1 subcloning                                            |
| CTDNEP1_HindIII_R           | 5' -CCCAAGCTTTCACCAGAGCCGATGTTGGT-3'                                         |                                                               |
| XbaI_SPO7_F                 | 5' -GCTCTAGAATGGAGCCAGAGAGCATAGG-3'                                          | SPO7 cloning into pRS315-PGK1                                 |
| SPO7_XmaI_R                 | 5' -TATCCCGGGTCATTCTGATTTAGGTCGGA-3'                                         |                                                               |
| XbaI_Nem1_F                 | 5' -GCTCTAGAATGAATGCCCTAAAATATTTCTCAAATCA-3'                                 | Nem1 cloning into pRS316-PGK1                                 |
| Nem1_SalI_R                 | 5' -CCCCGTCGACTCAGTTTATGTTGAATGCCTTCTCT-3'                                   |                                                               |
| BamHI_HA-ProtA_F            | 5' -GGCGGATCCTATCCATACGATGTTCTCTGA-3'                                        | For subcloning HA-protA into pRS315-PGK1                      |
| HA-ProtA-PstI_R             | 5' -GGGCTGCAGTCACTGATGATTCGCGTCT-3'                                          |                                                               |
| 5phos_HindIII-2xFLAG_F      | 5' Phos-AGCTTGATTATAAAGATGACGATGACAAGGATTATAAAGATGACGATGACAAGTAAG-3'         | 5'end is phosphorylated. Hybridized each other to make ds DNA |
| 5phos 2xFLAG-SalI_R         | 5' Phos-TCGACTTACTTGTTCATCGTCATCTTTATAATCCTTGTTCATCGTCATCTTTATAATCA-3'       |                                                               |
| NEP1-R1 C-ter BamHI_R       | 5' -GCGGGATCCTTGAACATGAGGCCTAGGTTTCAAA-3'                                    | For NEP1-R1-HA-protA construct                                |
| CTDNEP1 C-ter HindIII_R     | 5' -CCCAAGCTTCCAGAGCCGATGTTGGTGAA-3'                                         | For CTDNEP1-2xFlag construct                                  |
| CTDNEP1 D67N_F <sub>b</sub> | 5' -GGAAGATCCTGGTGCTG <b>A</b> ATCTGGATGAGACACTT-3'                          | (Asn to Asp)                                                  |
| CTDNEP1 D67N_R <sub>b</sub> | 5' -AAGTGTCTCATCCAGAT <b>T</b> CAGCACCAGGATCTTCC-3'                          |                                                               |
| PacI-C-ter CFP_F1           | 5' -CACCTTAATTAACGTGAGCAAGGGCGAGGAGC-3'                                      | Used for pFA6-CFP-HygroMX                                     |
| C-ter CFP-AscI_R1           | 5' -TGGCGCGCCTTACTTGTACAGCTCGTCCATGC-3'                                      |                                                               |
| SEC63-KI_F <sup>c</sup>     | 5' - <b>CGATACGGATACAGAAGCTGAAGATGATGAATCACCAGAA</b> CGGATCCCCGGGTTAATTAA-3' | Used for CFP tagging into SEC63 C-terminus                    |
| SEC63-KI_R <sup>c</sup>     | 5' - <b>TCTAAGAGCTAAAATGAAAACTATACTAATCACTTATAT</b> GAATTCGAGCTCGTTAAAC-3'   |                                                               |
| BglII_SEC63_F               | 5' -CACCAGATCTATGCCTACAAATTACGAGTATG-3'                                      |                                                               |
| CFP-BglII_R                 | 5'-CACCAGATCTTACTTGTACAGCTCGTCCATGC-3'                                       |                                                               |

a: Restriction enzyme sites are underlined.

b: Site directed mutated sequences are colored red.

c: The upstream or downstream sequence of the stop codon of SEC63 are in bold.

**Table S III.** Oligonucleotide primers used for real-time PCR quantitation of gene expression. m, mouse; h, human; f, forward; r, reverse; TBP, TATA box binding protein; HPRT, hypoxanthine phosphoribosyltransferase; B2M, beta-2-microglobulin.

| Primer                          | Sequence                                                         |
|---------------------------------|------------------------------------------------------------------|
| mLipin-1                        | 5' -CCTTCTATGCTGCTTTTGGGAACC-3'<br>5' -GTGATCGACCACTTCGCAGAGC-3' |
| mNEP1-R1                        | 5' -AGCTGCTCGATGTCTGAACGGTA-3'<br>5' -CCGTCACATGTCCGACTCCAAA-3'  |
| mCTDNEP1                        | 5' -AGATCCGCACGGTAATTCAG-3'<br>5' -GGTGTCCCAGGTCTCACTGT-3'       |
| mDsytrophin                     | 5' -AGTCCTCCCCAGGACACAAGCA-3'<br>5' -CCATCGCTCTGCCCAAATCATC-3'   |
| mATP2A2<br>(Serca2)             | 5' -ATCTCCTTGCCTGTGATCCTC-3'<br>5' -AGTCATGCAGAGGGCTGGTAG-3'     |
| mTBP                            | 5' -ACCCTTCACCAATGACTCCTATG-3'<br>5' -ATGATGACTGCAGCAAATCGC-3'   |
| hNEP1-R11<br>(TMEM188)          | 5' -GCTGCTCGATGTCTGAACGGTAT-3'<br>5' -CATATCCAACCGCAAAGGAATC-3'  |
| hCTDNEP1<br>(Dullard)           | 5' -TACCTTCTGCGGAGGCAGATCC-3'<br>5' -TGTCTCATCCAGATCCAGCACCA-3'  |
| hLipin-1                        | 5' -TGCTGGAGAGCAGCAGAACTC-3'<br>5' -TAGGGTATGAGGCTGACTGAG-3'     |
| hlipin-2                        | 5' -CCTTCCTCAGACCAGATCG-3'<br>5' -GGAGAATCTGTCCCAAAGCA-3'        |
| hHPRT                           | 5' -TATGGCGACCCGAGCCCT-3'<br>5' -CATCTCGAGCAAGACGTTTCAG-3'       |
| hβ2M                            | 5' -GTCTTTCAGCAAGGACTGGTC-3'<br>5' -CAAATGCGGCATCTTCAAACC-3'     |
| Oligos for knockdown studies    |                                                                  |
| ASO control                     | 5' -CCTTCCCTGAAGGTTCCCTCC-3'                                     |
| Lipin1-ASO                      | 5' -GGGATGAGATGCAGCCTCTC-3'                                      |
| siNEP1-R1<br>(mouse<br>TMEM188) | ON-TARGETplus SMART pool, Dharmacon Inc., Chicago, IL            |

**Table S IV.** Plasmids used in the human cell study

| <b>Plasmid</b>   | <b>Relevant characteristics</b>                                                                                                                           | <b>Source or reference</b> |
|------------------|-----------------------------------------------------------------------------------------------------------------------------------------------------------|----------------------------|
| CTDNEP1-V5 His   | Mammalian expression vector (pcDNA3.1/V5-His, Invitrogen) containing of CTDNEP1 sequence before tag                                                       | (Kim et al, 2007)          |
| CTDNEP1-2xFLAG   | Mammalian expression vector (pcDNA3.1, Invitrogen) containing C-terminally FLAG tagged CTDNEP1, subcloned from pRS316-PGK1-CTDNEP1-2xFLAG (see Table S I) | This study                 |
| NEP1-R1-FLAG     | Mammalian expression vector (pcDNA3.1) encoding C-terminal FLAG tagged NEP1-R1, which was PCR amplified from pRS315-PGK1-NEP1-R1 (see Table S I)          | This study                 |
| NEP1-R1-HA-ProtA | Mammalian expression vector (pcDNA3.1) containing C-terminally tagged NEP1-R1-HA-protA, subcloned from pRS316-PGK1-NEP1-R1-HA-ProtA (see Table S I)       | This study                 |
| HA-Lipin1b       | Mammalian expression vector (pcDNA3.1) containing N-terminally HA-tagged mouse Lpin1b                                                                     | (Kim et al, 2007)          |
| Lipin1a-V5 His   | Mammalian expression vector (pcDNA3.1/V5-His) containing C-terminally tagged mouse Lpin1a                                                                 | (Donkor et al, 2007)       |
| Lipin1b-V5 His   | Mammalian expression vector (pcDNA3.1/V5-His) containing C-terminally tagged mouse Lpin1b                                                                 | (Donkor et al, 2007)       |
| Lipin 2-V5 His   | Mammalian expression vector (pcDNA3.1/V5-His) containing C-terminally tagged mouse Lpin2                                                                  | (Donkor et al, 2007)       |

Donkor, J, Sariahmetoglu, M, Dewald, J, Brindley, DN, Reue, K (2007) Three mammalian lipins act as phosphatidate phosphatases with distinct tissue patterns. *J Biol Chem* **282**:3450-3457

Kim, Y, Gentry, MS, Harris, TE, Wiley, SE, Lawrence, JC, Dixon JE (2007) A conserved phosphatase cascade that regulates nuclear membrane biogenesis. *Proc Natl Acad Sci U S A* **104**:6596-6601
